1 **Short title:** Affinity purification of plant mitochondria

2

3 **Author for contact:**

4 Andreas P.M. Weber, <sup>1</sup>Institute of Plant Biochemistry, Cluster of Excellence on Plant  
5 Science (CEPLAS), Heinrich Heine University, Universitätsstrasse 1, 40225 Düsseldorf,  
6 Germany

7

8 **Rapid single-step affinity purification of HA-tagged mitochondria from *Arabidopsis***  
9 ***thaliana***

10

11 Franziska Kuhnert<sup>1</sup>, Anja Stefanski<sup>2</sup>, Nina Overbeck<sup>2</sup>, Kai Stühler<sup>2</sup>, Andreas P.M. Weber<sup>1</sup>

12

13 <sup>1</sup>Institute of Plant Biochemistry, Cluster of Excellence on Plant Science (CEPLAS), Heinrich  
14 Heine University, Universitätsstrasse 1, 40225 Düsseldorf, Germany

15 <sup>2</sup>Molecular Proteomics Laboratory, Biomedical Research Center, Heinrich Heine University,  
16 Universitätsstrasse 1, 40225 Düsseldorf, Germany

17 **One-sentence summary:** Affinity-tagging of mitochondria in plant cells with a triple  
18 hemagglutinin-tag enables single-step affinity purification of mitochondria in less than 20  
19 min.

20

21 **Author contributions:** F.K. generated transgenic lines harboring affinity-tagged  
22 mitochondria, isolated mitochondria, analyzed the data, and drafted the manuscript; A.S.,  
23 N.O., and K.S. performed the proteomics analysis and analyzed the data; A.P.M.W.  
24 conceived and supervised the experiments and contributed to the writing of the manuscript.

25

26 **Funding:** This work was supported by the Deutsche Forschungsgemeinschaft (CRC 1208  
27 and funding under Germany's Excellence Strategy – EXC-2048/1 – project ID 390686111").

28

29

30 **Email address of the author for contact:** [aweber@hhu.de](mailto:aweber@hhu.de)

31 **ABSTRACT**

32 Photosynthesis in plant cells would not be possible without the supportive role of  
33 mitochondria. However, isolation of mitochondria from plant cells, for physiological and  
34 biochemical analyses, is a lengthy and tedious process. Established isolation protocols  
35 require multiple centrifugation steps and substantial amounts of starting material. To  
36 overcome these limitations, we tagged mitochondria in *Arabidopsis thaliana* with a triple  
37 haemagglutinin-tag for rapid purification via a single affinity purification step. This protocol  
38 yields a substantial quantity of highly pure mitochondria from 1 g of Arabidopsis seedlings.  
39 The purified mitochondria were suitable for enzyme activity analyses and yielded sufficient  
40 amounts of proteins for deep proteomic profiling. We applied this method for the proteomic  
41 analysis of the Arabidopsis *bou-2* mutant deficient in the mitochondrial glutamate transporter  
42 À bout de souffle (BOU) and identified 27 differentially expressed mitochondrial proteins  
43 compared with transgenic Col-0 controls. Our work also sets the stage for the development  
44 of advanced mitochondria isolation protocols for distinct cell types.

45

## 46 INTRODUCTION

47 In all eukaryotic organisms, mitochondria are the major source of ATP, which is produced via  
48 the oxidative phosphorylation (OXPHOS) pathway, thus playing a vital role in cellular energy  
49 metabolism. Mitochondria also participate in amino acid metabolism as well as in  
50 photorespiration in photosynthetic eukaryotes. Photorespiration plays a crucial role in  
51 photosynthesis by detoxifying 2-phosphoglycolate, which is produced by the oxygenation of  
52 Rubisco and acts as an inhibitor of several plastidial enzymes (Ogren and Bowes, 1971;  
53 Kelly and Latzko, 1976; Husic et al., 1987). Plants reclaim 2-phosphoglycolate in the  
54 complex pathway of photorespiration, yielding 3-phosphoglycerate, which is returned to the  
55 Calvin Benson cycle. The photorespiratory pathway includes several enzymatic steps that  
56 occur in four subcellular compartments: plastids, peroxisomes, mitochondria, and cytosol  
57 (Eisenhut et al., 2019). Knockout mutants of genes encoding enzymes and transporters  
58 involved in photorespiration often show a photorespiratory phenotype, characterized by  
59 chlorotic leaves and growth inhibition under ambient carbon dioxide (CO<sub>2</sub>) conditions, which  
60 can be rescued in a CO<sub>2</sub> enriched environment (Peterhansel et al., 2010). A key step in  
61 photorespiration is the conversion of two glycine molecules into one serine residue in the  
62 mitochondrial matrix, accompanied by the release of CO<sub>2</sub> and ammonia. This step is  
63 catalyzed by the glycine decarboxylase (GDC) multienzyme system, comprising a P-protein  
64 (GLDP), H-protein (GDCH), L-protein (GDCL), and T-protein (GLDT), in combination with  
65 serine hydroxymethyltransferase (SHM) (Voll et al., 2006; Engel et al., 2007). In green  
66 tissues, these proteins constitute up to 50% of the total protein content of the mitochondrial  
67 matrix, indicating the importance of glycine oxidation in mitochondria (Oliver et al., 1990).

68 The *Arabidopsis thaliana bou-2* mutant was previously identified as lacking the mitochondrial  
69 glutamate transporter À bout de souffle (BOU), which is involved in photorespiration  
70 (Eisenhut et al., 2013). Plants lacking the inner mitochondrial membrane (IMM) protein BOU  
71 show a pronounced photorespiratory phenotype under ambient CO<sub>2</sub> conditions, significantly  
72 elevated CO<sub>2</sub> compensation point, and highly reduced GDC activity in the isolated  
73 mitochondria (Eisenhut et al., 2013). Because *BOU* is co-expressed with genes encoding  
74 components of the GDC complex, and the *bou-2* mutant shows a similar metabolic  
75 phenotype as the *shm1* mutant, it was hypothesized that BOU transports a metabolite  
76 necessary for the proper functioning of GDC (Voll et al., 2006; Eisenhut et al., 2013).  
77 Recently, it was demonstrated that heterologously expressed BOU functions as a glutamate  
78 transporter (Porcelli et al., 2018). Glutamate is neither a substrate nor a product of the  
79 reaction catalyzed by GDC. Besides its role in amino acid and N metabolism, glutamate is  
80 necessary for the glutamylation of tetrahydrofolate (THF), a cofactor of GLDT and SHM (Suh

81 et al., 2001). Glutamylation of THF increases its stability. Moreover, THF-dependent  
82 enzymes generally prefer polyglutamylated folates over monoglutamylated folates as a  
83 substrate (Suh et al., 2001). However, because (1) BOU is not the only glutamate  
84 transporter in mitochondria, and (2) glutamylation of folates is not restricted to mitochondria,  
85 the exact physiological function of BOU remains unclear (Hanson and Gregory, 2011;  
86 Monné et al., 2018). Notably, a glutamate/glutamine shuttle across the mitochondrial  
87 membrane was previously suggested to support the reclamation of ammonia released during  
88 photorespiration (Linka and Weber, 2005).

89 Analysis of the biochemical and physiological functions of mitochondria frequently requires  
90 the isolation of intact mitochondria. Mitochondria can be isolated from leaf tissue in less than  
91 1 h by differential centrifugation. This method yields mitochondria with good integrity and  
92 appropriate enzyme activity. However, mitochondria are frequently contaminated with  
93 plastids and peroxisomes. Hence, in many cases, a combination of differential centrifugation  
94 and Percoll density gradient is used (Millar et al., 2001; Werhahn et al., 2001; Keech et al.,  
95 2005). While this produces a pure fraction of respiratory active mitochondria with low plastid  
96 and peroxisome contamination, such procedures generally take several hours and require  
97 up to 50 g of starting material for producing sufficient yields (Keech et al., 2005). Moreover,  
98 traditional protocols are not practical for the isolation of mitochondria from mutants with  
99 severely impaired growth or from less abundant tissue types such as flowers and for the  
100 analysis of mitochondrial metabolites. Furthermore, media used for the isolation of  
101 mitochondria typically contain high concentrations of sugars and other metabolites that can  
102 potentially interfere with MS-based metabolite analyses.

103 Recently, Chen and coworkers reported a method for the rapid isolation of mitochondria from  
104 human HeLa cell cultures via co-immunopurification (co-IP) (Chen et al., 2016). The authors  
105 generated transgenic HeLa cell lines expressing a triple hemagglutinin (HA)-tagged  
106 enhanced green fluorescent protein (eGFP) fused to the outer mitochondrial membrane  
107 (OMM) localization sequence of OMP25 (3×HA-eGFP-OMP25). Because the epitope-tag  
108 was displayed on the surface of mitochondria, these transfected cell lines could be used to  
109 rapidly enrich mitochondria after cell homogenization. The HA-tagged mitochondria were  
110 captured and pulled down using magnetic beads coated with an anti-HA-tag antibody. Given  
111 the small size (1 µm diameter) and non-porous behavior of anti-HA-tag beads, these beads  
112 performed better than the porous agarose matrix for the enrichment of mitochondria. Thus,  
113 the authors established a method that ensures a high yield of pure mitochondria in  
114 approximately 12 min. The isolated mitochondria showed high purity, integrity, and  
115 functionality. Additionally, the authors developed a simple potassium-based buffer system

116 that maintains mitochondrial intactness and is compatible with downstream analyses, such  
117 as metabolite analysis by LC/MS (Chen et al., 2016).

118 Building on this previous work, we developed an affinity-tagging strategy for the rapid  
119 isolation of mitochondria from Arabidopsis. We generated transgenic Arabidopsis lines  
120 carrying an HA-tagged translocase of the OMM 5 (TOM5) and isolated highly pure and intact  
121 mitochondria from these lines in less than 25 min. The isolated mitochondria were  
122 successfully subjected to proteomics and enzyme activity analyses. Moreover, we applied  
123 the isolation strategy to the *bou-2* mutant, revealing differential protein abundance and  
124 enzyme activities.

125

## 126 RESULTS

### 127 Identification of TOM5 a suitable anchor peptide and generation of affinity-tagged 128 Arabidopsis lines

129 Recently, Chen and colleagues reported a rapid protocol for the isolation of intact  
130 mitochondria from transgenic HeLa cells expressing the mitochondrial fusion protein 3×HA-  
131 eGFP-OMP25 using co-IP. The Arabidopsis genome does not encode an ortholog of  
132 OMP25. Therefore, we screened the available Arabidopsis mitochondrial proteome data,  
133 including the OMM proteins with known topology and function, and identified TOM5 as a  
134 potential candidate for our mitochondria affinity-tagging approach. Together with TOM6,  
135 TOM7, TOM20, TOM22/9, and TOM40, TOM5 forms the protein import apparatus of plant  
136 mitochondria (Werhahn et al., 2003). In yeast (*Saccharomyces cerevisiae*), TOM5 is an  
137 integral protein of the OMM. It has a negatively-charged N-terminal domain, which faces  
138 toward the cytosol (Dietmeier et al., 1997) and can be fused to GFP without altering the  
139 subcellular localization of TOM5 (Horie et al., 2003). The protein import machinery is well  
140 conserved among eukaryotes. The predicted N-terminal cytosolic domain of Arabidopsis  
141 TOM5 is necessary for the recognition of cytosolically synthesized mitochondrial preproteins  
142 (Wiedemann et al., 2004). Therefore, we generated an N-terminal translational fusion of the  
143 Arabidopsis *TOM5* gene with triple HA-tagged *synthetic GFP* (*sGFP*) gene under the control  
144 of the Arabidopsis *UBIQUITIN10* promoter (*UB10p*) (*UB10p-3×HA-sGFP-TOM5*;  
145 Supplemental Fig. S1). The construct was used to stably transform Arabidopsis ecotype  
146 Columbia (Col-0) and *bou-2* mutant. Expression and localization of the fusion protein was  
147 verified in root and leaf tissues of 10-day-old Arabidopsis seedlings via confocal laser  
148 scanning microscopy. Transgenic Arabidopsis lines expressing the 3×HA-sGFP-TOM5  
149 protein in leaf and root mitochondria of Col-0 and *bou-2* seedlings were identified based on  
150 the co-localization of the fluorescent signal of GFP signal with that of the mitochondrial  
151 marker CMXRos (Fig. 1A–D). CMXRos is a lipophilic cationic dye that accumulates in the  
152 mitochondria because of the negative membrane potential; thus, it solely stains mitochondria  
153 with an intact respiratory chain (Pendergrass et al., 2004). Because the fluorescent signals  
154 of the 3×HA-sGFP-TOM5 protein (green) fully overlapped with those of the MitoTracker  
155 (red), we conclude that overexpression of the *UB10p-3×HA-sGFP-TOM5* construct in Col-0  
156 and *bou-2* does not affect mitochondrial intactness. In a few transgenic Col-0 lines, the  
157 fluorescent signal of sGFP formed a ring around the mitochondria, suggesting the  
158 localization of 3×HA-sGFP-TOM5 to the OMM (Fig. 1A, B). Notably, transgenic Col-0 or *bou-2*  
159 lines showed no apparent phenotypic differences compared with non-transgenic Col-0 or  
160 *bou-2* plants (control), respectively, under our culture conditions.

**Figure 1**

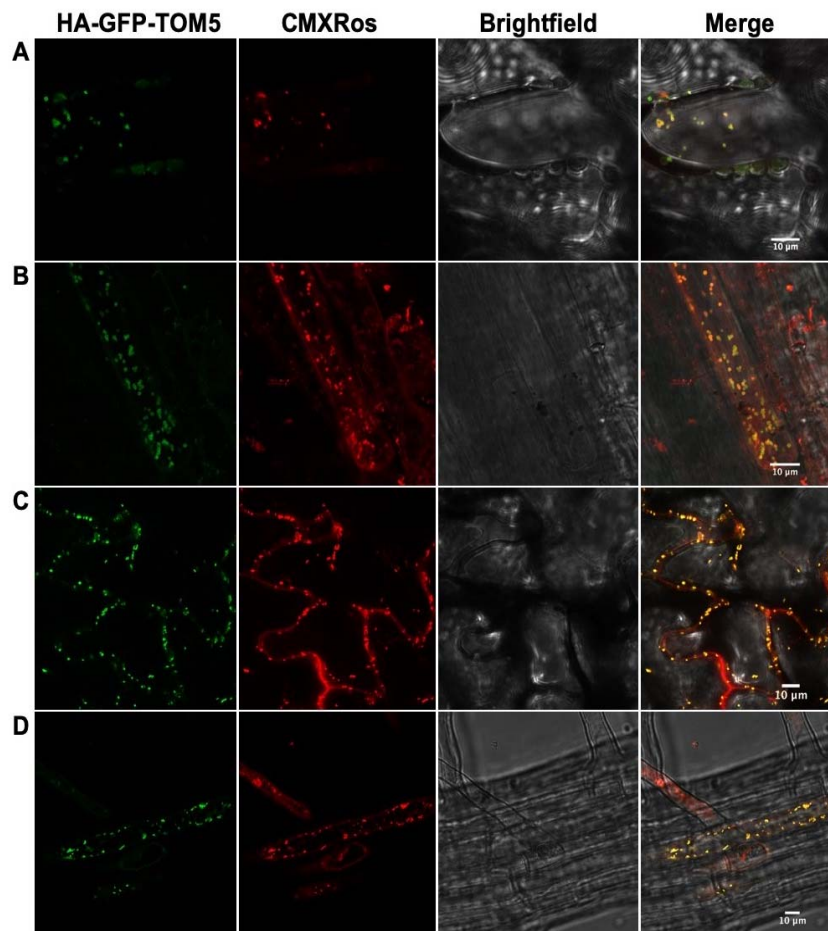

**Figure 1: Confocal microscopy of epitope-tagged mitochondria in leaf and root tissues of transgenic *Arabidopsis* Col-0 and *bou-2* lines expressing the *UB10p-3xHA-sGFP-TOM5* construct. (A–D) Images of transgenic Col-0 leaf (A) and root (B) tissues and transgenic *bou-2* leaf (C) and root (D) tissues expressing the 3xHA-sGFP-TOM5 protein. Green color represents GFP signal, whereas red color represents the signal of mitochondrial marker MitoTracker™ Red CMXRos. Bright field and merged images are shown in yellow. Scale bar = 10 μm.**



162 Transgenic Col-0 and *bou-2* lines were used for the isolation of intact HA-tagged  
163 mitochondria via co-IP using magnetic anti-HA beads. We chose HA as the epitope-tag for  
164 purification because it has a high affinity for its cognate antibody, and Chen and coworkers  
165 previously demonstrated that the size and non-porous behavior of the anti-HA beads yields a  
166 high amount of mitochondria (Chen et al., 2016). Additionally, we used the LC/MS-  
167 compatible buffer containing KCl and KH<sub>2</sub>PO<sub>4</sub> (KPBS) developed by Chen et al. (2016). Our  
168 purification procedure included five steps: homogenization of plant material in KPBS (1 min),  
169 filtration of the homogenate (1 min), two centrifugation steps (5 min and 9 min), and co-IP (7  
170 min, including washing steps). Altogether, mitochondria were purified from plant material in  
171 less than 25 min (Fig. 2). If the first centrifugation step used to remove contaminating  
172 chloroplasts and cell debris is omitted, the isolation time can be reduced to 18 min. The  
173 purified mitochondria were verified by immunoblot analyses using known organelle-specific  
174 protein markers. Mitochondria were enriched via co-IP only from lines harboring the  
175 mitochondrial 3×HA-sGFP-TOM5 protein, as demonstrated by immunoblot analyses with  
176 antibodies directed against different mitochondrial marker proteins including isocitrate  
177 dehydrogenase (IDH; mitochondrial matrix), alternative oxidase 1/2 (AOX1/2; IMM), and  
178 voltage-dependent anion channel 1 (VDAC1; OMM). No enrichment of mitochondria was  
179 observed in control Col-0 lines, indicating that the beads bind specifically to the HA-tag on  
180 mitochondria in transgenic lines (Fig. 3). Comparison with classical mitochondria isolation  
181 protocols using differential centrifugation and density gradient purification revealed that the  
182 mitochondrial fraction enriched using our affinity-tagging method showed significantly less  
183 contamination with proteins from plastids, peroxisomes, endoplasmic reticulum (ER),  
184 nuclei, and cytosol (Fig. 3). The following proteins were used as markers for different  
185 organelles: Rubisco large subunit (RbcL; plastid), catalase (Cat; peroxisome), luminal-  
186 binding protein 2 (BiP2; ER), histone H3 (nucleus), and heat shock cognate protein 70  
187 (HSC70; cytosol).

188 The intactness of mitochondria isolated from HA-tagged and control lines via co-IP was  
189 assessed based on the latency of malate dehydrogenase (MDH) activity. Additionally,  
190 isolation was performed in the presence of 1% (w/v) Triton X-114. MDH activity could be  
191 detected in mitochondria isolated from HA-tagged lines but not in those isolated from the  
192 control lines, thus verifying the results of our immunoblot analyses. When 1% (w/v) Triton X-  
193 114 was added to the washing buffer during co-IP, MDH activity was undetectable in both  
194 transgenic and control lines, as the detergent lyses the organelles (Fig. 4).

195 Typically, we used 5–10 g of Arabidopsis seedlings grown on agar plates for the isolation of  
196 mitochondria, and this yielded up to 700 µg of total mitochondrial protein. However,

**Figure 2**

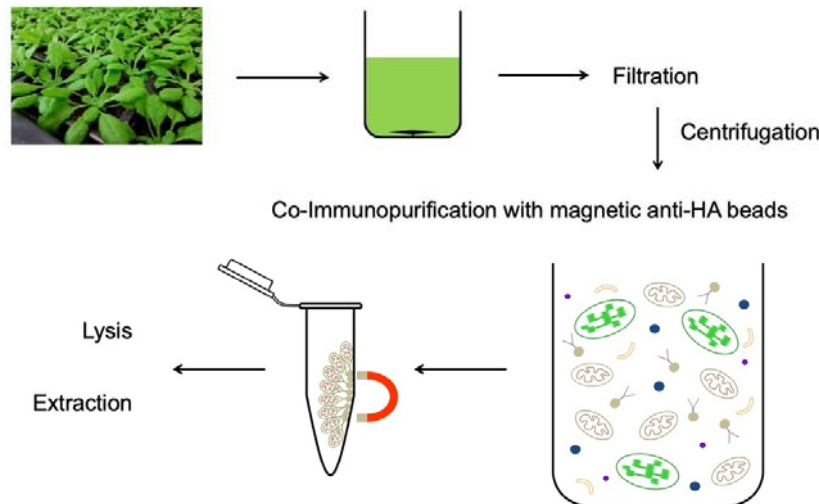

**Figure 2: Workflow showing the rapid isolation of epitope-tagged mitochondria via co-immunopurification (co-IP) from Arabidopsis.** Transgenic lines harboring the *UB10p-3xHA-sGFP-TOM5* construct and non-transgenic (control) plants were harvested and homogenized in a Warren blender. The extract was filtered and centrifuged to obtain a crude mitochondrial fraction. Epitope-tagged mitochondria were purified via co-IP using magnetic anti-HA beads. The purified mitochondria were washed and either lysed for immunoblot analysis or extracted for proteomics.

197 mitochondria could also be isolated from 1 g of starting material, yielding up to 200 µg of  
198 total mitochondrial protein. This is advantageous for very young seedlings or mutants with  
199 severely impaired growth. Isolation from less than 1 g of starting material may also result in  
200 an appropriate yield of mitochondria, but this was not tested in the current study.

201 Taken together, our data indicate that mitochondria can be rapidly isolated via co-IP using a  
202 simple LC/MS-compatible buffer.

**Figure 3**

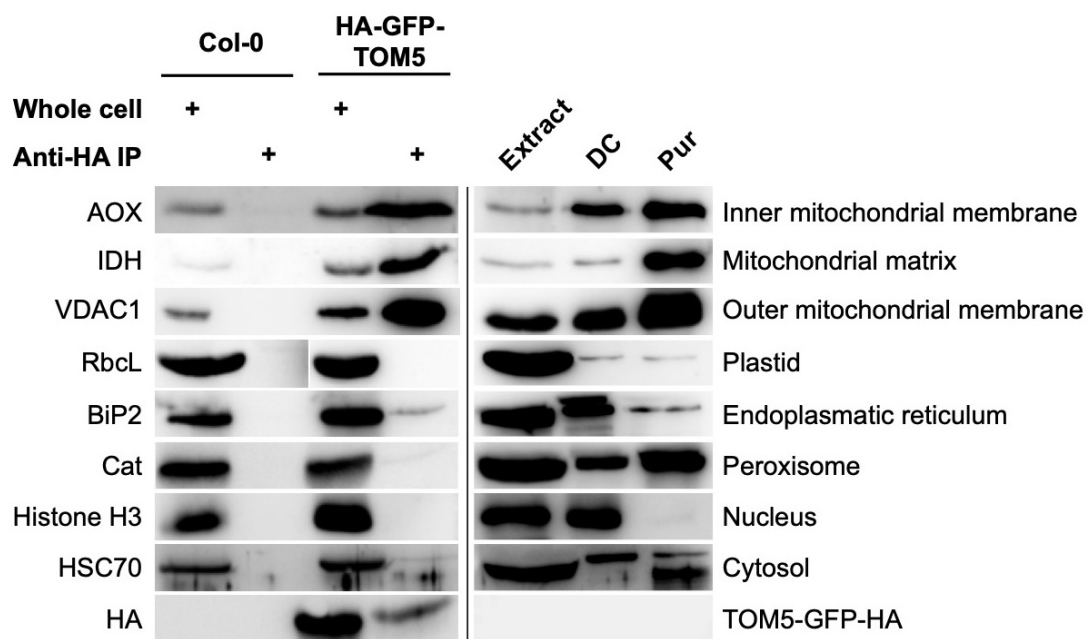

**Figure 3: Immunoblot analysis of mitochondria isolated via co-IP or by differential centrifugation and gradient purification.** Mitochondria were isolated from transgenic and non-transgenic (control) Col-0 and *bou-2* lines via co-IP using magnetic anti-HA beads (whole cell, Anti-HA IP) or using differential centrifugation and gradient purification (Extract, DC, Pur). Protein amounts were loaded as described in Material and Methods. Whole cell and extract samples were collected after tissue homogenization. Names of organelle marker proteins are shown on the left side of the blots, and their subcellular localization is indicated on the right.

203 **Enzyme assays using mitochondria affinity-purified from transgenic Col-0 and *bou-2***  
 204 **mutant lines**

205 We used our rapid mitochondria isolation method to study the effect of the mitochondrial  
 206 carrier protein BOU on mitochondrial metabolism in Arabidopsis.

**Figure 4**

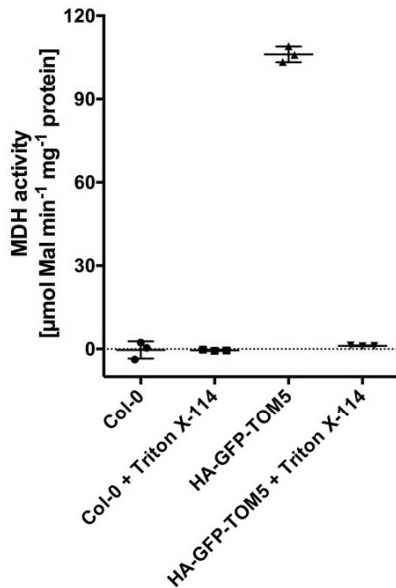

**Figure 4: Latency of MDH activity in affinity-purified mitochondria.** Mitochondria were rapidly isolated from transgenic and control Col-0 and *bou-2* plants via co-IP, with or without the addition of Triton X-114. The activity of MDH was calculated from the initial slope. Data represent mean  $\pm$  SD of three replicates.

207 To assess the effect of the *bou-2* mutant allele on mitochondrial metabolism, we rapidly  
208 isolated mitochondria from 10-day-old transgenic Col-0 and *bou-2* seedlings grown under  
209 elevated CO<sub>2</sub> conditions (3,000 ppm) and those shifted to ambient CO<sub>2</sub> conditions (380 ppm  
210 CO<sub>2</sub> after 5 days). Mitochondria were lysed and used to measure the activity of MDH,  
211 aspartate aminotransferase (AspAT), glutamate dehydrogenase (GluDH), alanine  
212 aminotransferase (AlaAT),  $\gamma$ -aminobutyric acid transaminase (GABA-T), and formate  
213 dehydrogenase (FDH). Enzyme activities were calculated from the initial slopes. Enzyme  
214 activities in transgenic *bou-2* mutant lines were compared with those in transgenic Col-0  
215 lines, which were set to 100%.

216 The activities of MDH and FDH were not affected in transgenic *bou-2* mutant lines under any  
217 of the conditions tested (Fig. 5A, B). The activities of AspAT and GABA-T in transgenic

Figure 5

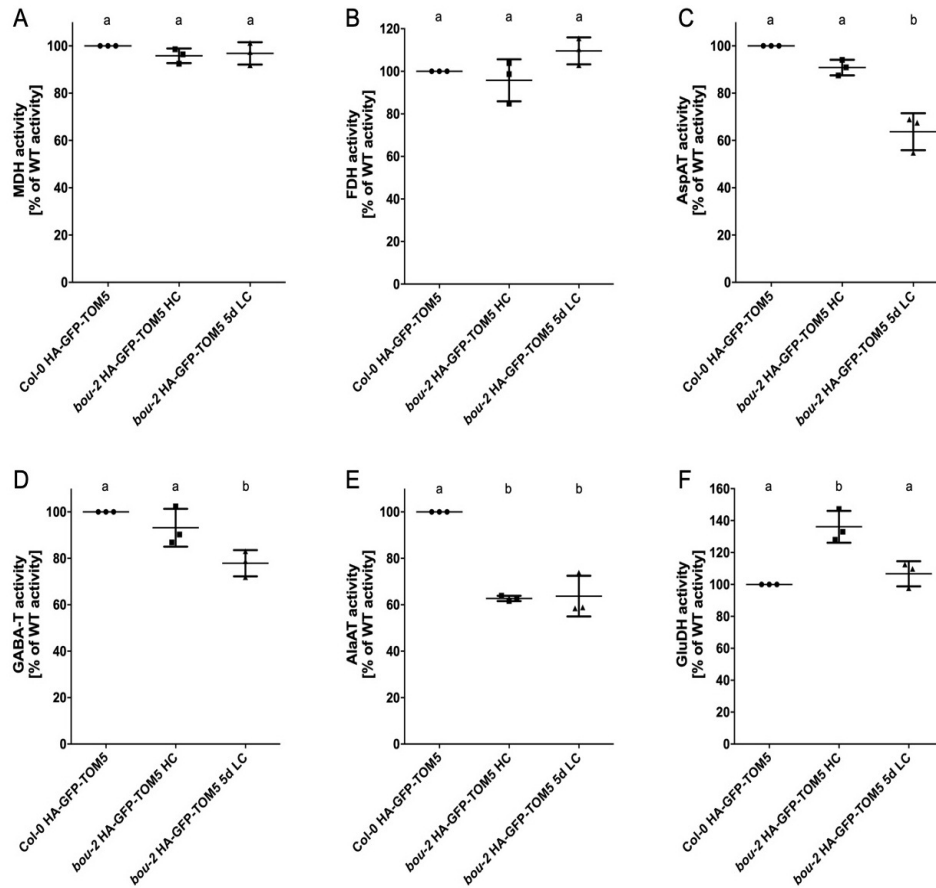

**Figure 5: Characterization of enzyme activities in mitochondria isolated from 10-day-old transgenic Col-0 and *bou-2* lines grown at 3,000 ppm (HC) and after shift to 380 ppm (5d LC) via co-IP. (A) Malate dehydrogenase (MDH) activity. (B) Formate dehydrogenase (FDH) activity. (C) Aspartate aminotransferase (AspAT) activity. (D)  $\gamma$ -aminobutyric acid transaminase (GABA-T) activity. (E) Alanine aminotransferase (AlaAT) activity. (F) Glutamate dehydrogenase (GluDH) activity. Activities were calculated from initial slopes. Enzyme activities in transgenic Col-0 were set to 100%. Data represent mean  $\pm$  SD of three biological replicates. Different letters indicate statistically significant differences between means for each enzyme ( $P < 0.05$ ; one-way ANOVA).**

218 mutant lines were similar to those in transgenic Col-0 lines, when mitochondria were isolated

219 from seedlings grown under elevated CO<sub>2</sub> conditions, but were significantly reduced in  
220 transgenic mutant lines after the shift to ambient CO<sub>2</sub> conditions (Fig. 5C, D). The activity of  
221 AlaAT was significantly reduced (Fig. 5E), whereas that of GluDH was significantly increased  
222 in transgenic mutant lines under elevated CO<sub>2</sub> conditions; however, both enzyme activities  
223 reverted back to the levels in transgenic Col-0 when seedlings were shifted to ambient CO<sub>2</sub>  
224 conditions (Fig. 5F). Together, our results suggest a possible involvement of BOU in  
225 mitochondrial amino acid and N metabolism.

226 In addition, we found that the activity of MDH was strongly reduced in 4-week-old transgenic  
227 *bou-2* mutant plants grown under elevated CO<sub>2</sub> conditions (Supplemental Fig. S2). However,  
228 no change was observed in MDH activity in 10-day-old transgenic *bou-2* plants, suggesting  
229 pleiotropic effects in older leaf tissues due to accumulating photorespiratory intermediates.

### 230 **Proteomic analysis of mitochondria affinity-purified from transgenic Col-0 and *bou-2*** 231 **mutant lines**

232 Mitochondria were isolated from 10-day-old transgenic Col-0 and *bou-2* seedlings grown  
233 under elevated CO<sub>2</sub> conditions in four independent biological replicates. Proteome analysis  
234 of the isolated mitochondria revealed 15,688 peptides belonging to 1,240 proteins present in  
235 at least three of the four replicates (Supplemental Table S1, Supplemental Table S2).

236 Subcellular localization of the quantified proteins was annotated using the SUBAcon  
237 database (Hooper et al., 2017). Summing up the label-free quantitation (LFQ) intensities of  
238 the spectra showed that 80% of all quantified peptides resulted from proteins localized or  
239 predicted to be localized to the mitochondria, 11.5% from plastid-localized proteins, and  
240 5.7% from proteins with no clear subcellular localization (designated as ambiguous).  
241 Additionally, more than 90% of the quantified peptides were assigned to the mitochondria.  
242 Contamination of the mitochondrial proteins by proteins from peroxisomes, ER, Golgi,  
243 vacuoles, endomembranes, plasma membranes, nuclei, and cytosol was less than 1% each  
244 (Supplemental Table S1, Supplemental Table S2). These results indicate high purity of the  
245 rapidly isolated mitochondria, which was comparable with the purity of classically isolated  
246 mitochondria (Klodmann et al., 2011; Senkler et al., 2017).

247 Next, we compared our proteome data with previous proteomic analyses and quantified  
248 proteins and some of the subunits of known mitochondrial complexes (Supplemental Table  
249 S1, Supplemental Table S2). The OXPHOS pathway of mitochondria consists of five protein  
250 complexes (I–V) located in the IMM. Complexes I to IV represent oxidoreductases, which  
251 comprise the respiratory chain that regenerates oxidized forms of cofactors involved in  
252 mitochondrial metabolism, thereby creating an electron flow. This leads to the simultaneous

253 export of protons into the intermembrane space (IMS). The built-up proton gradient is used  
254 by Complex V to generate ATP. Complex I is the largest complex involved in the OXPHOS  
255 pathway and comprises at least 47 protein subunits that form the so-called membrane and  
256 peripheral arms (Peters et al., 2013; Meyer et al., 2019). Except NDUA1, NDUB2, Nad4L,  
257 and Nad6 (At3g08610, At1g76200, AtMg00650, and AtMg00270, respectively), we could  
258 identify all Complex I subunits in our proteomic data set. Additionally, we identified eight  
259 previously proposed assembly factors (Meyer et al., 2019), five  $\gamma$ -carbonic anhydrases, and  
260 five additional proteins proposed to form a matrix-exposed domain attached to Complex I  
261 (Sunderhaus et al., 2006). Complex II is composed of eight subunits (Millar et al., 2004). In  
262 addition to its function in the OXPHOS pathway, Complex II also participates in the  
263 tricarboxylic acid cycle (TCA). Six out of eight subunits of Complex II and the assembly  
264 factor SDHAF2 were identified in our data set. Additionally, peptides of all proteins and  
265 isoforms of Complex III, eight of its assembly factors, and proteins previously defined as  
266 alternative pathways (Meyer et al., 2019) were identified in our data set. Complex V consists  
267 of 15 subunits, of which 13 were identified in our proteomic data set; Atp6 (AtMg00410 and  
268 AtMg011701) and Atp9 (AtMg01080) were the only two subunits that could not be identified.  
269 In addition, we found three of the five proposed assembly factors (Meyer et al., 2019). The  
270 cytochrome c oxidase complex (Complex IV) consists of 16 proposed subunits in  
271 Arabidopsis (Mansilla et al., 2018). Of these, 9 subunits and 11 assembly factors of Complex  
272 IV were identified in our proteomic data set. Furthermore, we identified three proteins  
273 involved in the assembly of OXPHOS supercomplexes (Meyer et al., 2019).

274 Except the abovementioned subunits of the SDH complex, all proteins of the TCA cycle and  
275 GDC multienzyme system were identified in the rapidly isolated mitochondria. Additionally,  
276 our proteomic data set contained a number of pentatricopeptide and tetratricopeptide repeat  
277 proteins involved in RNA metabolism as well as heat shock proteins and ribosomes involved  
278 in protein control and turnover (Supplemental Table S1, Supplemental Table S2).

279 In Arabidopsis, the majority of mitochondrial proteins are encoded by nuclear genes,  
280 translated in the cytosol, and then imported into the mitochondria. The import and sorting of  
281 nuclear-encoded mitochondrial preproteins requires functional TOM and sorting and  
282 assembly machinery (SAM) in the OMM, mitochondrial IMS import and assembly (MIA)  
283 machinery in the IMS, and translocase of the IMM (TIM) in the IMM (Murcha et al., 2014). All  
284 mitochondrial preproteins enter the mitochondria via the TOM complex in the OMM. In the  
285 IMS, membrane proteins are sorted via the small TIM proteins toward the SAM or TIM22  
286 complex for incorporation into the OMM or IMM. Soluble proteins of the mitochondrial matrix  
287 are imported via the TIM17:23 complex, and proteins that remain in the IMS are processed  
288 via the MIA machinery (Murcha et al., 2014). In this study, we identified all of these proteins

289 in our proteome data set, except the OMM protein TOM6, IMS protein ERV1, IMM protein  
290 PRAT5, and matrix proteins MGE1 and ZIM17. Additionally, we identified plant-specific  
291 import components, including OM64, PRAT3, and PRAT4, in the OMM (Murcia et al., 2015)  
292 and proteins of the mitochondrial contact site and cristae organizing system (MICOS), which  
293 connects the IMM to OMM (van der Laan et al., 2016). Other notable OMM proteins  
294 identified in our proteomic data set included GTPases MIRO1 and MIRO2, lipid biosynthesis  
295 protein PECT, and  $\beta$ -barrel proteins VDAC1–4 (Supplemental Table S1, Supplemental Table  
296 S2). Recently, it was shown that the cytosolic protein GAPC interacts with VDAC (Schneider  
297 et al., 2018); we also identified GAPC in our proteomic data set.

298 Overall, we conclude that mitochondria isolated using our rapid isolation method are suitable  
299 for proteomic analyses.

### 300 **Differential analysis of the mitochondrial proteome of transgenic Col-0 and *bou-2*** 301 **lines**

302 To assess the effect of *bou-2* mutation on the mitochondrial proteome, we performed  
303 comparative proteomic analysis of transgenic Col-0 and *bou-2* lines. A total of 47 proteins  
304 showed significantly increased abundance in the mutant, of which five were localized to the  
305 mitochondria. Additionally, 44 proteins showed significantly decreased abundance in the  
306 transgenic *bou-2* samples, of which 22 were predicted to be localized to the mitochondria  
307 (Table 1); among these proteins, BOU was the least abundant. The *bou-2* line is a GABI-Kat  
308 line that carries a T-DNA insertion in the second exon of the *BOU* gene (Kleinboelting et al.,  
309 2012; Eisenhut et al., 2013). We identified two peptides of BOU in at least three of the four  
310 replicates of transgenic *bou-2* samples. Both peptides were translated from the first exon of  
311 the gene. Because the T-DNA was inserted in the second exon of the gene, it is possible  
312 that the first exon was translated. However, a functional protein is not synthesized in the  
313 knockout mutant (Eisenhut et al., 2013). Among the mitochondrial proteins showing  
314 significantly reduced abundance in transgenic *bou-2* seedlings, we identified six proteins of  
315 the OXPHOS pathway (three Complex I proteins and one protein each of Complex II, III, and  
316 V), two proteins involved in protein translocation, two proteins involved in metabolite  
317 transport, two proteins involved in lipid metabolism, three proteins involved in protein  
318 turnover/synthesis, one protein involved in the TCA cycle, and six proteins (including FDH)  
319 involved in other processes. Among the proteins with significantly increased abundance in  
320 transgenic *bou-2* mutant, we identified two proteins involved in RNA/DNA metabolism, one  
321 protein involved in THF metabolism, one MIRO-related GTPase, and one LETM1-like protein  
322 (Table 1).



323 Previously, Eisenhut and colleagues showed that GDC activity is reduced in mitochondria  
324 isolated from 4-week-old *bou-2* mutant plants (Eisenhut et al., 2013). The authors showed  
325 that the *bou-2* mutant accumulated higher amounts of glycine than the wild type and  
326 exhibited differential amount and status of the P-protein. Immunoblot analysis showed no  
327 differences in the levels of other GDC proteins in the *bou-2* mutant compared with the wild  
328 type (Eisenhut et al., 2013). In our proteomic data set, none of the proteins of the GDC  
329 complex or SHMT showed significant differences between transgenic Col-0 and *bou-2*  
330 seedlings (Table 2). However, the amounts of GLDP1, GLDP2, GDCH1, GDCL1, GDCL2,  
331 and GLDT were slightly reduced, whereas those of SHM1, SHM2, and GDCH3 were  
332 increased in the mutant compared with Col-0. Among these proteins, the strongest reduction  
333 was detected in the amount of GDCH1. However, differences in protein levels between  
334 transgenic Col-0 and *bou-2* seedlings were not statistically significant. Only one peptide  
335 related to GDCH2 was detected in our data set; however, because it was detected in only  
336 one of the four replicates, it is not listed Supplemental Table S1.

337 In this study, we showed that mitochondria of the *bou-2* mutant displayed reduced AlaAT  
338 activity, increased GluDH activity, and no change in MDH, AspAT, GABA-T, and FDH  
339 activities under elevated CO<sub>2</sub> conditions compared with that under ambient CO<sub>2</sub> conditions  
340 (Fig. 4A–F). Except FDH, none of the assayed enzymes showed significantly altered  
341 amounts in our proteomic data set (Table 2). The amount of FDH was significantly reduced  
342 in transgenic *bou-2* samples; however, its activity was not altered in the mutant under both  
343 elevated and ambient CO<sub>2</sub> conditions, indicating post-translational modification of FDH. The  
344 level of AlaAT was slightly increased in the mutant but showed only 60% activity compared  
345 with Col-0 under both elevated and ambient CO<sub>2</sub> conditions. The activities of MDH, AspAT,  
346 and GABA-T did not differ between transgenic Col-0 and *bou-2* mutant under elevated CO<sub>2</sub>  
347 conditions, although these proteins were more abundant in transgenic mutant samples. The  
348 activity of GluDH was significantly increased in the mutant compared with Col-0 under  
349 elevated CO<sub>2</sub> conditions, which may be associated with the increased amount of protein  
350 detected in the transgenic *bou-2* seedlings in our proteomic data set. However, this increase  
351 was not statistically significant.

352 Overall, we conclude that differences in the activities of MDH, AspAT, GluDH, AlaAT, GABA-  
353 T, and AlaAT measured in this study and that of GDC measured in a previous study most  
354 likely do not relate to changes in protein abundance in mitochondria of Col-0 vs. *bou-2*  
355 mutant but instead might be caused by metabolic impairment or post-translational  
356 modifications.

357

## 358 DISCUSSION

359 Recently, analyses of mitochondrial proteome content, complexome composition, post-  
360 translational modifications, energy metabolism, OXPHOS complex formation and function,  
361 protein translocation, and metabolite shuttles have been conducted to further our  
362 understanding of mitochondrial metabolism in Arabidopsis (König et al., 2014; Fromm et al.,  
363 2016; De Col et al., 2017; Rao et al., 2017; Senkler et al., 2017; Porcelli et al., 2018; Hu et  
364 al., 2019; Kolli et al., 2019; Meyer et al., 2019; Nickel et al., 2019). Many of these analyses  
365 required the isolation of intact mitochondria. Here, we report a procedure for the rapid  
366 isolation of HA-tagged mitochondria from transgenic Arabidopsis lines via co-IP.  
367 Mitochondria isolated using this method showed high enrichment of mitochondrial marker  
368 proteins, with only minor contamination, as demonstrated by immunoblot and quantitative  
369 proteomic analyses (Fig. 3, Supplemental Table S1, Supplemental Table S2).

370 The method reported here enables the isolation of intact mitochondria from Arabidopsis  
371 seedlings in less than 25 min (Fig. 2, Fig. 3). Moreover, by omitting the first centrifugation  
372 step, the isolation time could be shortened to 18 min, although the resulting mitochondrial  
373 fraction contained a higher level of other contaminating cellular components. The  
374 mitochondrial fraction used for proteomic analyses in this study was obtained using the  
375 slightly longer protocol that results in lower contamination with non-mitochondrial proteins.  
376 Nevertheless, this isolation method is significantly faster than the standard isolation  
377 procedures that generally take up to several hours. To date, we have been able to  
378 successfully isolate mitochondria from whole seedlings, leaves, and roots (data not shown).  
379 Moreover, this method could be used for the rapid isolation of mitochondria from other plant  
380 tissues such as flowers and developing seeds because (1) the expression of the affinity tag  
381 is driven by the ubiquitous *UB10p* promoter (Supplemental Fig. S1) and (2) only a small  
382 amount of starting material (as low as 1 g) is needed. Additionally, this method is  
383 advantageous for the isolation of mitochondria from very young tissues or mutants with  
384 growth defects or reduced biomass accumulation. The rapid isolation method is superior to  
385 the standard isolation protocols with respect to the yield of mitochondria; we were able to  
386 isolate 200 µg of total mitochondrial protein from 1 g of starting material and up to 700 µg  
387 total mitochondrial protein from 10 g of whole Arabidopsis seedlings. By contrast, the  
388 standard isolation protocols yield only 1.2 mg mitochondria from 50 g of leaves (Keech et al.,  
389 2005). Generally, a higher yield is expected using our isolation method, as the HA-tag has  
390 high affinity for its cognate antibody. Further optimization of the protocol and bead to extract  
391 ratio may result in even higher yields.

392 The purity of affinity-purified mitochondria was similar to that of mitochondria isolated using  
393 standard protocols including density gradients (Senkler et al., 2017). Immunoblot analysis  
394 revealed only minor contamination with proteins of the ER or peroxisomes in affinity-purified  
395 mitochondria (Fig. 3). These results were corroborated by quantitative proteomic analysis.  
396 Less than 3% of all quantified proteins were assigned to peroxisomes, ER, Golgi, vacuoles,  
397 endomembranes, plasma membranes, nuclei, and cytosol. The highest contamination was  
398 due to plastid-localized proteins (Supplemental Table S1, Supplemental Table S2).  
399 However, we cannot exclude the possibility that some of the contaminants bound non-  
400 specifically to the beads, despite extensive washing. Approximately 80% of the identified  
401 proteins and 90% of the identified peptides showed mitochondrial localization (Supplemental  
402 Table S1, Supplemental Table S2). Thus, we conclude that the purity of mitochondria  
403 isolated using the rapid affinity purification method is comparable with that of mitochondria  
404 isolated using traditional methods. We cannot comment on the physiological activity and  
405 coupling state of affinity-purified mitochondria because we could not efficiently elute the  
406 mitochondria from the magnetic beads with HA peptide. However, mitochondria could be  
407 efficiently eluted using SDS-PAGE or detergent lysis buffer. Elution of intact mitochondria  
408 might be achievable by integrating a protease cleavage site between the HA-tag and GFP;  
409 this will be explored in future studies.

410 In our data set, we were able to identify 96% and 99% of the proteins detected by Klodmann  
411 et al. (2011) and Senkler et al. (2017), respectively, in previous analyses of mitochondrial  
412 proteomes and their complexome composition (Supplemental Table S1, Supplemental Table  
413 S2). On the basis of a recent review on the composition and function of OXPHOS in  
414 mitochondria (Meyer et al., 2019), we were able to identify 86% of all the predicted subunits  
415 and assembly factors. To date, all of the proteins reviewed in Meyer et al. (2019) have not  
416 been confirmed, and it might require an in-depth analysis or membrane enrichment to  
417 confirm their presence in mitochondria in proteomic studies. Previously, it was reported that  
418 the subunit ND4L is difficult to detect in proteomic studies because of its hydrophobic nature  
419 (Peters et al., 2013). Consistent with this observation, we also could not identify this protein  
420 in our proteome or in the list of quantified peptides (Supplemental Table S1, Supplemental  
421 Table S2). However, we were able to detect all proteins of the TCA cycle (except two  
422 subunits of Complex II), all GDC proteins, majority of the proteins and subunits of the  
423 TIM/TOM protein import apparatus, metabolite transporters of amino acids, dicarboxylic  
424 acids, cofactors, ions and energy equivalents (e.g., BOU, BAC, UCP, DCT, SAMC, NDT,  
425 APC, AAC, and PHT), as well as many proteins involved in protein synthesis/turnover and  
426 DNA/RNA metabolism (Supplemental Table S1, Supplemental Table S2). Thus, our rapidly  
427 isolated mitochondria showed good purity, integrity, and functionality.

428 Among all of the identified proteins, 20% could not be assigned to mitochondria. These  
429 proteins included components of PSI and PSII; these could be clearly categorized as  
430 contamination. However, we also identified proteins with unknown function and no clear  
431 prediction of localization. In addition, we detected proteins such as GAPC, which was  
432 previously shown to interact with the OMM protein VDAC (Schneider et al., 2018). Therefore,  
433 we predict that some of the proteins classified as contaminants might represent novel  
434 mitochondrial proteins, for example, as part of OMM protein complexes in the cytosol or as  
435 components of complexes at organellar contact sites. However, this needs to be evaluated  
436 in more detail in the future.

437 Application of the novel method to a mutant lacking the mitochondrial glutamate transporter  
438 BOU resulted in the detection of surprisingly few changes in protein abundances compared  
439 with Col-0. Only 22 mitochondrial proteins showed a significant reduction in abundance in  
440 the *bou-2* mutant, whereas five proteins were significantly increased in abundance.  
441 However, only changes in a mitochondrial folylpolyglutamate synthetase (FGPS) and in  
442 FDH, which contributes to the production of CO<sub>2</sub> by oxidizing formate, might be connected to  
443 photorespiration. Formate is released from 10-formyl-THF by 10-formyl deformylase, an  
444 enzyme involved in the maintenance of the THF pool in mitochondrial matrix (Collakova et  
445 al., 2008). Reduced GDC activity in *bou-2* might result in a lower production of formate and  
446 finally a reduced abundance of FDH. FGPS is involved in vitamin B9 metabolism by  
447 catalyzing the glutamylation of THF, a cofactor of GLDT and SHM (Hanson and Gregory,  
448 2011). No significant changes were detected in the abundance of any of the proteins of the  
449 GDC multienzyme system. SHM1, SHM2, and GDCH3 were slightly more abundant in the  
450 mutant than Col-0, whereas the others seem to be slightly reduced; however, this trend did  
451 not meet the significance threshold (Table 2). The observed changes were not pronounced  
452 and did not explain why the GDC activity was reduced to approximately 15% of the Col-0  
453 level in the *bou-2* mutant. A possible explanation could be that Eisenhut and coworkers used  
454 4-week-old rosettes (Eisenhut et al., 2013), whereas we used 10-day-old seedlings in the  
455 current study. This possibility is supported by the observation that no difference in MDH  
456 activity could be detected between 10-day-old mutant and Col-0 seedlings (Fig. 5A).  
457 However, in 4-week-old leaves, the MDH activity was significantly reduced in the mutant  
458 compared with Col-0 (Supplemental Fig. S2). In contrast to GDC, the abundance of FDH  
459 was significantly reduced in the mutant, whereas its activity was unaltered compared with  
460 Col-0 (Table 1, Fig. 5B). Previously, FDH was identified in a lysine acetylome study of  
461 Arabidopsis mitochondria from 10-day-old Col-0 seedlings (König et al., 2014). This might  
462 indicate that FDH activity is more likely regulated by post-translational modifications than by  
463 protein abundance.

464 The BOU protein was recently assigned the function of a glutamate transporter (Porcelli et  
465 al., 2018). Glutamate is indirectly linked to photorespiration, as it is needed for the  
466 polyglutamylation of THF, which increases its stability and promotes the activity of THF-  
467 dependent enzymes (Hanson and Gregory, 2011). However, in addition to BOU,  
468 mitochondria-localized uncoupling proteins 1 and 2 show glutamate uptake activity in  
469 Arabidopsis (Monné et al., 2018). This raises the question why knockout of the *BOU* gene  
470 leads to a photorespiratory phenotype in young tissues, if BOU is not the only glutamate  
471 transporter of mitochondria. Additionally, polyglutamylation is not restricted to mitochondria,  
472 as Arabidopsis contains three isoforms of FGPS localized to the mitochondria, plastids, and  
473 cytosol (Hanson and Gregory, 2011). Folate transporters prefer monoglutamylated forms of  
474 THF, whereas enzymes generally prefer polyglutamylated forms (Suh et al., 2001). These  
475 data indicate that BOU performs other functions, in addition to glutamate transport *in vivo*.  
476 We exclude its function as a mitochondrial glutamate/glutamine shuttle, as BOU shows no  
477 glutamine uptake activity (Porcelli et al., 2018). However, it is possible that BOU is involved  
478 in folate metabolism, as folate biosynthesis occurs only in mitochondria (Hanson and  
479 Gregory, 2011). This possibility, however, needs to be investigated in future studies.

## 480 **CONCLUSIONS**

481 Our experiments show that affinity-tagging is a powerful tool not only for the analysis of  
482 protein-protein interactions but also for the isolation of functional organelles from  
483 Arabidopsis. The mitochondria isolated using this method showed high purity and integrity.  
484 Future studies will be required to assess the physiological state of the isolated mitochondria  
485 after elution from magnetic beads and to determine the applicability of this method for  
486 metabolite analyses. To conduct metabolite analyses, it is encouraging that the LC/MS-  
487 compatible buffer system developed previously for mammalian mitochondria (Chen et al.,  
488 2016) can also be used for the isolation of mitochondria from plant tissues. Expressing the  
489 affinity tag under the control of cell-specific promoters will allow the isolation of mitochondria  
490 from specific cell types, such as meristems or guard cells (Yang et al., 2008; Schürholz et  
491 al., 2018). The use of cell-specific promoters in our construct will help unravel the complex  
492 role of mitochondria in various cell types. We expect that similar tagging strategies will be  
493 applicable to other plant cell organelles, such as plastids and peroxisomes. Moreover,  
494 simultaneous expression of several different affinity tags will facilitate the affinity purification  
495 of different organelles from a single extract.

## 496 MATERIAL AND METHODS

### 497 Pant growth conditions

498 *Arabidopsis* ecotype Col-0 and *bou-2* mutant (GABI-Kat line number 079D12;  
499 <http://www.gabi-kat.de/db/lineid.php>) (Kleinboelting et al., 2012) were used in this study.  
500 Seeds were sterilized by washing with 70% (v/v) ethanol supplemented with 1% (v/v) Triton  
501 X-100 twice for 10 min each, followed by washing with 100% ethanol twice for 10 min each.  
502 Seeds were grown on half-strength Murashige and Skoog (1/2 MS) medium (pH 5.8)  
503 supplemented with 0.8% (w/v) agar. Seeds were subjected to cold stratification for 2 days at  
504 4°C. After germination, seedlings were grown under 12 h light/12 h dark photoperiod under  
505 100  $\mu\text{mol m}^{-2} \text{s}^{-1}$  light intensity and 3,000 ppm CO<sub>2</sub>-enriched atmosphere, unless otherwise  
506 stated.

### 507 Construction of transgenic lines

508 The HA epitope-tag was amplified with a start codon from the Gateway binary vector  
509 pGWB15. The coding sequence (CDS) of sGFP, minus the start and stop codons but  
510 including a linker peptide (GGSG) at the 5' and 3' ends, was amplified from the Gateway  
511 binary vector pGWB4. The CDS of *TOM5* (minus the start codon) was amplified from  
512 *Arabidopsis* cDNA. Starting from the 5'-end to the 3'-end, the amplified 3×HA-tag, sGFP, and  
513 *TOM5* were cloned into the pUTKan vector under the control of the *Arabidopsis UB10p* using  
514 restriction endonucleases. The construct was introduced into *Agrobacterium tumefaciens*,  
515 strain GV3101::pMP90, which was then introduced into Col-0 and *bou-2* plants via  
516 *Agrobacterium*-mediated transformation using the floral dip method, as described previously  
517 (Clough and Bent, 1998).

### 518 Confocal laser scanning microscopy

519 The expression of 3×HA-sGFP-TOM5 was verified via confocal laser scanning microscopy  
520 using the Zeiss LSM 78 Confocal Microscope and Zeiss ZEN software. The Col-0 and *bou-2*  
521 seedlings regenerated from independent transformation events were incubated with 200 nM  
522 MitoTracker Red CMXRos (Molecular Probes) in 1/2 MS supplemented with 3% (w/v)  
523 sucrose for 15 min. Images were captured using the following excitation/emission  
524 wavelengths: sGFP (488 nm/490–550 nm) and MitoTracker Red CMXRos (561 nm/580–625  
525 nm). Pictures were processed using the ImageJ software (<https://imagej.nih.gov/ij/>).

### 526 Rapid isolation of mitochondria using co-IP

527 Epitope-tagged mitochondria were rapidly isolated using co-IP, as described previously  
528 (Chen et al., 2016). Briefly, 1–10 g of *Arabidopsis* seedlings were harvested and

529 homogenized in KPBS (10 mM KH<sub>2</sub>PO<sub>4</sub> [pH 7.25] and 136 mM KCl) using a Warren blender.  
530 The resulting homogenate was filtered through three layers of miracloth supported by a  
531 nylon mesh and centrifuged at 2,500 × *g* for 5 min. The pellet containing cell debris and  
532 chloroplasts was discarded. The supernatant was subsequently centrifuged at 20,000 × *g* for  
533 9 min. The pellet representing the crude mitochondrial fraction was resuspended in KPBS  
534 using a fine paintbrush and homogenized using a Potter-Elvehjem. Crude mitochondria were  
535 incubated with pre-washed magnetic anti-HA beads (ThermoFisher Scientific) on an end-  
536 over-end rotator for 5 min. Magnetic beads were separated using a magnetic stand and  
537 washed at least three times with KPBS. In the detergent treatment control, KPBS was  
538 supplemented with 1% (v/v) Triton X-114 in all washing steps. The purified mitochondria  
539 were lysed using mitochondria lysis buffer (50 mM TES/KOH [pH 7.5], 2 mM EDTA, 5 mM  
540 MgCl<sub>2</sub>, 10% [v/v] glycerol, and 0.1% [v/v] Triton X-100) for enzyme activity assays and  
541 immunoblot analysis or directly frozen in liquid nitrogen for proteome and metabolite  
542 analyses. All steps were carried out at 4°C. The amount of protein recovered after lysis was  
543 determined using the Quick Start™ Bradford Protein Assay Kit (Bio-Rad), with bovine serum  
544 albumin (BSA) as the standard.

#### 545 **Isolation of mitochondria using the traditional approach**

546 Mitochondria were isolated from 10-day-old Col-0 seedlings via differential centrifugation and  
547 Percoll gradient purification, as described previously (Kühn et al., 2015).

#### 548 **Immunoblot analysis**

549 25 µg of total leaf extract and 6.45 µg of isolated mitochondria fractions were heated at 96°C  
550 in SDS-PAGE loading buffer for 10 min and separated on 12% SDS-polyacrylamide gels  
551 (Laemmli, 1970). Proteins were transferred to 0.2 µm polyvinylidene difluoride membranes  
552 (PVDF) or 0.45 µm nitrocellulose membranes using standard protocols. Protein transfer was  
553 verified by staining the membranes with Ponceau S red. Membranes were blocked  
554 according to the manufacturer's instructions for 1 h, washed with Tris-buffered saline  
555 containing 0.1% (v/v) Tween-20 (TBST) and subsequently incubated with either a primary  
556 antibody or a single-step antibody overnight at 4°C. Antibodies against marker proteins were  
557 diluted as follows: anti-AOX (1:1,000), anti-IDH (1:5,000), anti-VDAC1 (1:5,000), anti-HA-  
558 HRP (1:5,000), anti-RbcL (1:7,500), anti-Cat (1:1,000), anti-BiP2 (1:2,000), anti-Histone H3  
559 (1:5,000), and anti-HSC70 (1:3,000). Membranes were washed with TBST twice for 10 min  
560 each and incubated with the secondary goat anti-Rabbit-HRP antibody (1:5,000) at room  
561 temperature for 1 h or at 4°C overnight. Subsequently, membranes were washed with TBST  
562 five times for 5 min each and visualized using a chemiluminescence detection system

563 (Immobilon Western HRP Substrate, Merck Millipore). All steps were carried out with  
564 phosphate-buffered saline (PBS), when using anti-Cat antibody.

### 565 **Enzyme assays**

566 Activities of mitochondrial enzymes were measured using a spectrophotometer, based on  
567 the absorbance at 340 nm. The activity of MDH was measured based on the oxidation of  
568 NADH to NAD<sup>+</sup> at 340 nm, as described previously (Tomaz et al., 2010). The reaction  
569 mixture contained 50 mM KH<sub>2</sub>PO<sub>4</sub> (pH 7.5), 0.2 mM NADH, 5 mM EDTA, 10 mM MgCl<sub>2</sub>, 2  
570 mM OAA (Tomaz et al., 2010), and 0.1–0.4 µg total mitochondrial protein. AspAT activity  
571 was measured in a reaction coupled with MDH, as described previously (Wilkie and Warren,  
572 1998), with 0.3–1 µg total mitochondrial protein per assay. No external pyridoxal-5'-  
573 phosphate was added to the reaction mixture. GluDH activity was measured as described  
574 previously (Turano et al., 1996), based on the reduction of NAD<sup>+</sup> to NADH at 340 nm. To  
575 determine the amination activity, 0.5–2 µg total mitochondrial protein was used per assay.  
576 GABA-T activity was measured in a reaction coupled with succinate-semialdehyde  
577 dehydrogenase (SSADH), as described previously (Clark et al., 2009). The assay buffer  
578 contained 50 mM TAPS (pH 9), 0.2 mM NAD<sup>+</sup>, 0.625 mM EDTA, 8 mM GABA, 2 mM  
579 pyruvate, 1 U/ml SSADH, and 2–5 µg total mitochondrial protein. The NAD<sup>+</sup>-dependent  
580 SSADH was purified from *Escherichia coli*, as described previously (Clark et al., 2009). The  
581 recombinant purified protein catalyzed the production of NADH with a specific activity of 1.6  
582 U/mg protein. AlaAT activity was measured in reaction coupled with lactate dehydrogenase,  
583 as described previously (Miyashita et al., 2007), with 1–5 µg total mitochondrial protein. FDH  
584 activity was measured based on the reduction of NAD<sup>+</sup> to NADH at 340 nm and 30°C, with  
585 1–5 µg total mitochondrial protein. The assay buffer contained 100 mM KH<sub>2</sub>PO<sub>4</sub> (pH 7.5),  
586 1mM NAD<sup>+</sup>, and 50 mM sodium formate.

### 587 **Sample preparation for LC/MS analysis**

588 To elute proteins from magnetic beads, 30 µl of Laemmli buffer was added to the reaction  
589 mixture, and samples were incubated at 95°C for 10 min. Subsequently, 20 µl of protein  
590 sample was loaded on an SDS-polyacrylamide gel for in-gel digestion. The isolated gel  
591 pieces were reduced using 50 µl of 10 mM DTT, then alkylated using 50 µl of 50 mM  
592 iodoacetamide, and finally digested using 6 µl of trypsin (200 ng) in 100 mM ammonium  
593 bicarbonate. The peptides were resolved in 15 µl of 0.1% trifluoroacetic acid and subjected to  
594 LC/MS analysis.



## 595 **LC/MS analysis**

596 The LC/MS analysis was performed on a Q Exactive Plus mass spectrometer (Thermo  
597 Scientific, Bremen, Germany) connected to an Ultimate 3000 Rapid Separation LC system  
598 (Dionex; Thermo Scientific, Idstein, Germany) and equipped with an Acclaim PepMap 100  
599 C18 column (75  $\mu$ m inner diameter  $\times$  25 cm length  $\times$  2 mm particle size; Thermo Scientific,  
600 Bremen, Germany). The length of the isocratic LC gradient was 120 min. The mass  
601 spectrometer was operated in positive mode and coupled with a nano electrospray ionization  
602 source. Capillary temperature was set at 250°C, and source voltage was set at 1.4 kV. The  
603 survey scans were conducted at a mass to charge (m/z) ranging from 200 to 2000 and a  
604 resolution of 70,000. The automatic gain control was set at 3,000,000, and the maximum fill  
605 time was set at 50 ms. The ten most intensive peptide ions were isolated and fragmented by  
606 high-energy collision dissociation (HCD).

## 607 **Computational MS data analysis**

608 Peptide and protein identification and quantification was performed using MaxQuant version  
609 1.5.5.1 (MPI for Biochemistry, Planegg, Germany) with default parameters. The identified  
610 Arabidopsis peptides and proteins were queried against a specific proteome database  
611 (UP0000006548, downloaded 12/11/17) from UniProt. The oxidation and acetylation of  
612 methionine residues at the N-termini of proteins were set as variable modifications, while  
613 carbamidomethylations at cysteine residues were considered as fixed modification. Peptides  
614 and proteins were accepted with a false discovery rate of 1%. Unique and razor peptides  
615 were used for label-free quantification, and peptides with variable modifications were  
616 included in the quantification. The minimal ratio count was set to two, and the 'matched  
617 between runs' option was enabled.

618 Normalized intensities, as provided by MaxQuant, were analyzed using the Perseus  
619 framework (version 1.5.0.15; MPI for Biochemistry, Planegg, Germany). Only proteins  
620 containing at least two unique peptides and a minimum of three valid values in at least one  
621 group were quantified. Proteins which were identified only by site or marked as a  
622 contaminant (from the MaxQuant contaminant list) were excluded from the analysis.  
623 Differential enrichment of proteins in the two groups (*Col-0*; *bou-2*) was assessed using  
624 Student's *t*-test. Significance analysis was applied on log<sub>2</sub>-transformed values using an S0  
625 constant of 0 and a false discovery rate of 5%, as threshold cutoffs.

626 The MS proteomics data has been deposited to the ProteomeXchange Consortium via the  
627 PRIDE partner repository with the data set identifier PXD014137.

## 628 **SUPPLEMENTAL MATERIAL**

629 **Supplemental Table S1:** List of proteins identified and quantified in Col-0 and *bou-2* plants  
630 expressing the 3×HA-sGFP-TOM5 protein.

631 **Supplemental Table S2:** List of raw intensities and reliability of all quantified peptides.

632 **Supplemental Figure S1:** Schematic representation of the vector used to label  
633 mitochondria with triple HA-tag.

634 **Supplemental Figure S2:** Activity of malate dehydrogenase (MDH) in mitochondria rapidly  
635 isolated from 4-week-old Col-0 and *bou-2* leaves expressing the *UB10p-3×HA-sGFP-TOM5*  
636 construct.

### 637 **ACKNOWLEDGEMENTS**

638 This work was supported by the Deutsche Forschungsgemeinschaft (CRC 1208 and funding  
639 under Germany's Excellence Strategy – EXC-2048/1 – project ID 390686111“).

### 640 **FIGURE LEGENDS**

641 **Figure 1: Confocal microscopy of epitope-tagged mitochondria in leaf and root**  
642 **tissues of transgenic Arabidopsis Col-0 and *bou-2* lines expressing the *UB10p-3×HA-***  
643 ***sGFP-TOM5* construct.** (A–D) Images of transgenic Col-0 leaf (A) and root (B) tissues and  
644 transgenic *bou-2* leaf (C) and root (D) tissues expressing the 3×HA-sGFP-TOM5 protein.  
645 Green color represents GFP signal, whereas red color represents the signal of mitochondrial  
646 marker MitoTracker™ Red CMXRos. Bright field and merged images are shown in yellow.  
647 Scale bar = 10 μm.

648 **Figure 2: Workflow showing the rapid isolation of epitope-tagged mitochondria via co-**  
649 **immunopurification (co-IP) from Arabidopsis.** Transgenic lines harboring the *UB10p-*  
650 *3×HA-sGFP-TOM5* construct and non-transgenic (control) plants were harvested and  
651 homogenized in a Warren blender. The extract was filtered and centrifuged to obtain a crude  
652 mitochondrial fraction. Epitope-tagged mitochondria were purified via co-IP using magnetic  
653 anti-HA beads. The purified mitochondria were washed and either lysed for immunoblot  
654 analysis or extracted for proteomics.

655 **Figure 3: Immunoblot analysis of mitochondria isolated via co-IP or by differential**  
656 **centrifugation and gradient purification.** Mitochondria were isolated from transgenic and  
657 non-transgenic (control) Col-0 and *bou-2* lines via co-IP using magnetic anti-HA beads  
658 (whole cell, Anti-HA IP) or using differential centrifugation and gradient purification (Extract,  
659 DC, Pur). Protein amounts were loaded as described in Material and Methods. Whole cell  
660 and extract samples were collected after tissue homogenization. Names of organelle marker

661 proteins are shown on the left side of the blots, and their subcellular localization is indicated  
662 on the right.

663 **Figure 4: Latency of MDH activity in affinity-purified mitochondria.** Mitochondria were  
664 rapidly isolated from transgenic and control Col-0 and *bou-2* plants via co-IP, with or without  
665 the addition of Triton X-114. The activity of MDH was calculated from the initial slope. Data  
666 represent mean  $\pm$  SD of three replicates.

667 **Figure 5: Characterization of enzyme activities in mitochondria isolated from 10-day-**  
668 **old transgenic Col-0 and *bou-2* lines grown at 3,000 ppm (HC) and after shift to 380**  
669 **ppm (5d LC) via co-IP.** (A) Malate dehydrogenase (MDH) activity. (B) Formate  
670 dehydrogenase (FDH) activity. (C) Aspartate aminotransferase (AspAT) activity. (D)  $\gamma$ -  
671 aminobutyric acid transaminase (GABA-T) activity. (E) Alanine aminotransferase (AlaAT)  
672 activity. (F) Glutamate dehydrogenase (GluDH) activity. Activities were calculated from initial  
673 slopes. Enzyme activities in transgenic Col-0 were set to 100%. Data represent mean  $\pm$  SD  
674 of three biological replicates. Different letters indicate statistically significant differences  
675 between means for each enzyme ( $P < 0.05$ ; one-way ANOVA).

#### 676 SUPPLEMENTARY DATA

677 **Supplemental Table S1: List of proteins identified and quantified in Col-0 and *bou-2***  
678 **plants expressing the 3 $\times$ HA-sGFP-TOM5 protein.** Intensities of identified proteins are  
679 given as log<sub>2</sub>-transformed values. Subcellular localization was assigned using SUBA4.  
680 Difference between Col-0 and *bou-2* was calculated as the change in log<sub>2</sub>-transformed  
681 values. Significance was calculated using the Student *t*-test ( $P < 0.05$ ).

682 **Supplemental Table S2: List of raw intensities and reliability of all quantified peptides.**  
683 PEP: Posterior Error Probability of identification.

684 **Supplemental Figure S1: Schematic representation of the vector used to label**  
685 **mitochondria with triple HA-tag.** The N-terminal end of Arabidopsis gene encoding the  
686 outer mitochondrial membrane protein TOM5 (At5g08040) was fused to the *synthetic green*  
687 *fluorescent protein (sGFP)* gene labeled with a triple hemagglutinin (3 $\times$ HA) tag for co-  
688 Immunopurification. The cassette was cloned into the pUTKan vector under the control of  
689 the Arabidopsis *UBIQUITIN10* promoter (*UB10p*) and stably introduced into Arabidopsis via  
690 the floral dip method.

691 **Supplemental Figure S2: Activity of malate dehydrogenase (MDH) in mitochondria**  
692 **rapidly isolated from 4-week-old Col-0 and *bou-2* leaves expressing the *UB10p*-3 $\times$ HA-**  
693 **sGFP-TOM5 construct.** MDH activity was measured as described in Material and Methods.

694 Activities were calculated from initial slopes. Enzyme activity in transgenic Col-0 was set to  
695 100%. Data represent mean  $\pm$  SD of three biological replicates. Asterisks indicate  
696 statistically significant differences (\*\*\*,  $P < 0.001$ ; Student's *t*-test).

697

698 **Table 1: List of significant differences in protein abundance between Col-0 *UB10p-***  
 699 ***3xHA-sGFP-TOM5* and *bou-2 UB10p-3xHA-sGFP-TOM5*.** Difference was calculated as  
 700 change of log<sub>2</sub> of normalized intensity. List includes only proteins that show mitochondrial  
 701 localization. List ranges from most downregulated in *bou-2 UB10p-3xHA-sGFP-TOM5* (top)  
 702 to most upregulated *bou-2 UB10p-3xHA-sGFP-TOM5* (bottom). Significance was calculated  
 703 with Student's t-test,  $P < 0.05$ .

| AGI       | Gene symbol | Gene description                                                                         | Difference |
|-----------|-------------|------------------------------------------------------------------------------------------|------------|
| AT5G46800 | BOU         | Mitochondrial substrate carrier family protein                                           | -8,66407   |
| AT2G42310 | AT2G42310   | ESSS subunit of NADH:ubiquinone oxidoreductase (complex I) protein                       | -2,0953    |
| AT5G41685 | AT5G41685   | Mitochondrial outer membrane translocase complex, subunit Tom7                           | -1,90711   |
| AT3G03100 | AT3G03100   | NADH:ubiquinone oxidoreductase, 17.2kDa subunit                                          | -1,33356   |
| AT5G53650 | AT5G53650   | ABC transporter A family protein                                                         | -1,25252   |
| AT5G67590 | FRO1        | NADH-ubiquinone oxidoreductase-like protein                                              | -1,0968    |
| AT5G40810 | AT5G40810   | Cytochrome C1 family                                                                     | -1,06444   |
| AT3G27280 | PHB4        | prohibitin 4                                                                             | -0,94888   |
| AT3G27380 | SDH2-1      | succinate dehydrogenase 2-1                                                              | -0,764682  |
| AT4G37660 | AT4G37660   | Ribosomal protein L12/ ATP-dependent Clp protease adaptor protein ClpS family protein    | -0,732468  |
| AT2G42210 | OEP16-3     | Mitochondrial import inner membrane translocase subunit Tim17/Tim22/Tim23 family protein | -0,710023  |
| AT3G55400 | OVA1        | methionyl-tRNA synthetase / methionine-tRNA ligase / MetRS (cpMetRS)                     | -0,705525  |
| AT5G14780 | FDH         | formate dehydrogenase                                                                    | -0,697987  |

|           |           |                                                                    |           |
|-----------|-----------|--------------------------------------------------------------------|-----------|
| AT2G38670 | PECT1     | phosphorylethanolamine cytidyltransferase 1                        | -0,606253 |
| AT5G63400 | ADK1      | adenylate kinase 1                                                 | -0,603703 |
| AT1G79230 | MST1      | mercaptopyruvate sulfurtransferase 1                               | -0,587758 |
| AT4G30010 | AT4G30010 | ATP-dependent RNA helicase                                         | -0,545131 |
| AT3G03420 | AT3G03420 | Ku70-binding family protein                                        | -0,531796 |
| AT4G31810 | AT4G31810 | ATP-dependent caseinolytic (Clp) protease/crotonase family protein | -0,461768 |
| AT1G19140 | AT1G19140 | ubiquinone biosynthesis COQ9-like protein                          | -0,455841 |
| AT4G31460 | AT4G31460 | Ribosomal L28 family                                               | -0,430804 |
| AT1G54220 | AT1G54220 | Dihydrolipoamide acetyltransferase, long form protein              | -0,324755 |
| AT3G59820 | LETM1     | LETM1-like protein                                                 | 0,42657   |
| AT5G27540 | MIRO1     | MIRO-related GTP-ase 1                                             | 0,447933  |
| AT3G10160 | DFC       | DHFS-FPGS homolog C                                                | 0,507662  |
| AT1G71260 | ATWHY2    | WHIRLY 2                                                           | 0,51931   |
| AT5G15980 | AT5G15980 | Pentatricopeptide repeat (PPR) superfamily protein                 | 0,8335    |

704

705

706 **Table 2: List of changes in protein abundance of glycine decarboxylase proteins,**  
 707 **serine hydroxymethyltransferase (SHM) and the enzymes malate dehydrogenase**  
 708 **(MDH), formate dehydrogenase (FDH), aspartate aminotransferase (ASP),  $\gamma$ -**  
 709 **aminobutyric acid transaminase (POP2), alanine aminotransferase (AlaAT) and**  
 710 **glutamate dehydrogenase (GDH).** Difference was calculated as change of  $\log_2$  of  
 711 normalized intensity. Significance was calculated with Student's t-test,  $P < 0.05$ .

712

| AGI       | Gene symbol | Gene description                         | Difference | Significant |
|-----------|-------------|------------------------------------------|------------|-------------|
| AT4G33010 | GLDP1       | glycine decarboxylase P-protein 1        | -0,373902  | no          |
| AT2G26080 | GLDP2       | glycine decarboxylase P-protein 2        | -0,155379  | no          |
| AT2G35370 | GDCH1       | glycine decarboxylase H-protein 1        | -0,760396  | no          |
| AT1G32470 | GDCH3       | glycine decarboxylase H-protein 3        | 0,173202   | no          |
| AT1G11860 | GLDT        | Glycine cleavage T-protein family        | -0,164196  | no          |
| AT1G48030 | GDCL1       | mitochondrial lipoamide dehydrogenase 1  | -0,0284281 | no          |
| AT3G17240 | GDCL2       | mitochondrial lipoamide dehydrogenase 2  | -0,217162  | no          |
| AT4G37930 | SHM1        | serine hydroxymethyltransferase 1        | 0,109162   | no          |
| AT5G26780 | SHM2        | serine hydroxymethyltransferase 2        | 0,696879   | no          |
| AT5G14780 | FDH         | formate dehydrogenase                    | -0,697987  | yes         |
| AT5G18170 | GDH1        | glutamate dehydrogenase 1                | 0,91113    | no          |
| AT5G07440 | GDH2        | glutamate dehydrogenase 2                | 0,105005   | no          |
| AT3G22200 | POP2        | $\gamma$ -aminobutyric acid transaminase | 0,345683   | no          |
| AT1G17290 | AlaAT1      | alanine aminotransferase 1               | 0,640894   | no          |
| AT1G72330 | AlaAT2      | alanine aminotransferase 2               | 0,223008   | no          |

|                 |                                             |           |    |
|-----------------|---------------------------------------------|-----------|----|
| AT2G30970 ASP1  | aspartate aminotransferase 1                | 0,399954  | no |
| AT1G53240 mMDH1 | Lactate/malate dehydrogenase family protein | 0,564951  | no |
| AT3G15020 mMDH2 | Lactate/malate dehydrogenase family protein | 0,0343099 | no |

---

713

714



## Parsed Citations

**Chen WW, Freinkman E, Wang T, Birsoy K, Sabatini DM (2016) Absolute Quantification of matrix metabolites reveals the dynamics of mitochondrial metabolism. Cell 166: 1324-1337.e11**

Pubmed: [Author and Title](#)

Google Scholar: [Author Only Title Only Author and Title](#)

**Clark SM, Di Leo R, Dhanoa PK, Van Cauwenberghe OR, Mullen RT, Shelp BJ (2009) Biochemical characterization, mitochondrial localization, expression, and potential functions for an Arabidopsis gamma-aminobutyrate transaminase that utilizes both pyruvate and glyoxylate. J Exp Bot 60: 1743-57**

Pubmed: [Author and Title](#)

Google Scholar: [Author Only Title Only Author and Title](#)

**Clough SJ, Bent AF (1998) Floral dip: a simplified method for Agrobacterium-mediated transformation of Arabidopsis thaliana. Plant J 16: 735-43**

Pubmed: [Author and Title](#)

Google Scholar: [Author Only Title Only Author and Title](#)

**De Col V, Fuchs P, Nietzel T, Elsässer M, Voon CP, Candeo A, Seeliger I, Fricker MD, Grefen C, Møller IM, et al (2017) ATP sensing in living plant cells reveals tissue gradients and stress dynamics of energy physiology. Elife 6: 1-29**

Pubmed: [Author and Title](#)

Google Scholar: [Author Only Title Only Author and Title](#)

**Collakova E, Goyer A, Naponelli V, Krassovskaya I, Gregory JF, Hanson AD, Shachar-Hill Y (2008) Arabidopsis 10-formyl tetrahydrofolate deformylases are essential for photorespiration. Plant Cell 20: 1818-32**

Pubmed: [Author and Title](#)

Google Scholar: [Author Only Title Only Author and Title](#)

**Dietmeier K, Hönlinger A, Bömer U, Dekker PJ, Eckerskorn C, Lottspeich F, Kubrich M, Pfanner N (1997) Tom5 functionally links mitochondrial preprotein receptors to the general import pore. Nature 388: 195-200**

Pubmed: [Author and Title](#)

Google Scholar: [Author Only Title Only Author and Title](#)

**Eisenhut M, Planchais S, Cabassa C, Guivarc'h A, Justin AM, Taconnat L, Renou JP, Linka M, Gagneul D, Timm S, et al (2013) Arabidopsis ABOUT de SOUFFLE is a putative mitochondrial transporter involved in photorespiratory metabolism and is required for meristem growth at ambient CO2 levels. Plant J 73: 836-849**

Pubmed: [Author and Title](#)

Google Scholar: [Author Only Title Only Author and Title](#)

**Eisenhut M, Roell M, Weber APM (2019) Mechanistic understanding of photorespiration paves the way to a new green revolution. New Phytol doi: 10.1111/nph.15872**

Pubmed: [Author and Title](#)

Google Scholar: [Author Only Title Only Author and Title](#)

**Engel N, van den Daele K, Kolukisaoglu U, Morgenthal K, Weckwerth W, Parnik T, Keerberg O, Bauwe H (2007) Deletion of Glycine Decarboxylase in Arabidopsis Is Lethal under Nonphotorespiratory Conditions. Plant Physiol 144: 1328-1335**

Pubmed: [Author and Title](#)

Google Scholar: [Author Only Title Only Author and Title](#)

**Fromm S, Senkler J, Eubel H, Peterhänsel C, Braun H-P (2016) Life without complex I: proteome analyses of an Arabidopsis mutant lacking the mitochondrial NADH dehydrogenase complex. J Exp Bot 67: 3079-93**

Pubmed: [Author and Title](#)

Google Scholar: [Author Only Title Only Author and Title](#)

**Hanson AD, Gregory JF (2011) Folate biosynthesis, turnover, and transport in plants. Annu Rev Plant Biol 62: 105-125**

Pubmed: [Author and Title](#)

Google Scholar: [Author Only Title Only Author and Title](#)

**Hooper CM, Castleden IR, Tanz SK, Aryamanesh N, Millar AH (2017) SUBA4: the interactive data analysis centre for Arabidopsis subcellular protein locations. Nucleic Acids Res 45: D1064-D1074**

Pubmed: [Author and Title](#)

Google Scholar: [Author Only Title Only Author and Title](#)

**Horie C, Suzuki H, Sakaguchi M, Mihara K (2003) Targeting and assembly of mitochondrial tail-anchored protein Tom5 to the TOM complex depend on a signal distinct from that of tail-anchored proteins dispersed in the membrane. J Biol Chem 278: 41462-41471**

Pubmed: [Author and Title](#)

Google Scholar: [Author Only Title Only Author and Title](#)

**Hu Y, Zou W, Wang Z, Zhang Y, Hu Y, Qian J, Wu X, Ren Y, Zhao J (2019) Translocase of the outer mitochondrial membrane 40 is required for mitochondrial biogenesis and embryo development in Arabidopsis. Front Plant Sci 10: 1-17**

Pubmed: [Author and Title](#)

Google Scholar: [Author Only Title Only Author and Title](#)

**Husic DW, Husic HD, Tolbert NE, Black CC (1987) The oxidative photosynthetic carbon cycle or C2 cycle. CRC Crit Rev Plant Sci 5: 45-**

100

Pubmed: [Author and Title](#)

Google Scholar: [Author Only Title Only Author and Title](#)

**Keech O, Dizengremel P, Gardeström P (2005) Preparation of leaf mitochondria from Arabidopsis thaliana. Physiol Plant. doi: 10.1111/j.1399-3054.2005.00521.x**

Pubmed: [Author and Title](#)

Google Scholar: [Author Only Title Only Author and Title](#)

**Kelly GJ, Lutzko E (1976) Inhibition of spinach-leaf phosphofructokinase by 2-phosphoglycollate. FEBS Lett 68: 55–58**

Pubmed: [Author and Title](#)

Google Scholar: [Author Only Title Only Author and Title](#)

**Kleinboelting N, Huet G, Kloetgen A, Viehoveer P, Weisshaar B (2012) GABI-Kat SimpleSearch: new features of the Arabidopsis thaliana T-DNA mutant database. Nucleic Acids Res 40: D1211–D1215**

Pubmed: [Author and Title](#)

Google Scholar: [Author Only Title Only Author and Title](#)

**Klodmann J, Senkler M, Rode C, Braun H-P (2011) Defining the protein complex proteome of plant mitochondria. Plant Physiol 157: 587–598**

Pubmed: [Author and Title](#)

Google Scholar: [Author Only Title Only Author and Title](#)

**Kolli R, Soll J, Carrie C (2019) OXA2b is crucial for proper membrane insertion of COX2 during biogenesis of Complex IV in plant mitochondria. Plant Physiol 179: 601–615**

Pubmed: [Author and Title](#)

Google Scholar: [Author Only Title Only Author and Title](#)

**König AC, Hartl M, Boersema PJ, Mann M, Finkemeier I (2014) The mitochondrial lysine acetylome of Arabidopsis. Mitochondrion 19: 252–260**

Pubmed: [Author and Title](#)

Google Scholar: [Author Only Title Only Author and Title](#)

**Kühn K, Obata T, Feher K, Bock R, Fernie AR, Meyer EH (2015) Complete mitochondrial Complex I deficiency induces an up-regulation of respiratory fluxes that is abolished by traces of functional Complex I. Plant Physiol 168: 1537–1549**

Pubmed: [Author and Title](#)

Google Scholar: [Author Only Title Only Author and Title](#)

**van der Laan M, Horvath SE, Pfanner N (2016) Mitochondrial contact site and cristae organizing system. Curr Opin Cell Biol 41: 33–42**

Pubmed: [Author and Title](#)

Google Scholar: [Author Only Title Only Author and Title](#)

**Laemmli UK (1970) Cleavage of structural proteins during the assembly of the head of bacteriophage T4. Nature 227: 680**

Pubmed: [Author and Title](#)

Google Scholar: [Author Only Title Only Author and Title](#)

**Lawand S, Dorne A-J, Long D, Coupland G, Mache R, Carol P (2002) Arabidopsis ABOUT DE SOUFFLE, which is homologous with mammalian carnitine acyl carrier, is required for postembryonic growth in the light. Plant Cell 14: 2161–2173**

Pubmed: [Author and Title](#)

Google Scholar: [Author Only Title Only Author and Title](#)

**Linka M, Weber APM (2005) Shuffling ammonia between mitochondria and plastids during photorespiration. Trends Plant Sci 10: 461–5**

Pubmed: [Author and Title](#)

Google Scholar: [Author Only Title Only Author and Title](#)

**Mansilla N, Racca S, Gras DE, Gonzalez DH, Welchen E (2018) The Complexity of Mitochondrial Complex IV: An update of cytochrome c oxidase biogenesis in plants. Int J Mol Sci 19: 1–34**

Pubmed: [Author and Title](#)

Google Scholar: [Author Only Title Only Author and Title](#)

**Meyer EH, Welchen E, Carrie C (2019) Assembly of the complexes of the oxidative phosphorylation system in land plant mitochondria. Annu Rev Plant Biol 70: 23–50**

Pubmed: [Author and Title](#)

Google Scholar: [Author Only Title Only Author and Title](#)

**Millar AH, Eubel H, Jänsch L, Kruff V, Heazlewood JL, Braun H-P (2004) Mitochondrial cytochrome c oxidase and succinate dehydrogenase complexes contain plant specific subunits. Plant Mol Biol 56: 77–90**

Pubmed: [Author and Title](#)

Google Scholar: [Author Only Title Only Author and Title](#)

**Millar AH, Sweetlove LJ, Giegé P, Leaver CJ (2001) Analysis of the Arabidopsis mitochondrial proteome. Plant Physiol 127: 1711–27**

Pubmed: [Author and Title](#)

Google Scholar: [Author Only Title Only Author and Title](#)

**Miyashita Y, Dolferus R, Ismond KP, Good AG (2007) Alanine aminotransferase catalyses the breakdown of alanine after hypoxia in**

**Arabidopsis thaliana. Plant J 49: 1108–1121**

Pubmed: [Author and Title](#)

Google Scholar: [Author Only Title Only Author and Title](#)

**Monné M, Daddabbo L, Gagneul D, Obata T, Hielscher B, Palmieri L, Miniero DV, Fernie AR, Weber APM, Palmieri F (2018) Uncoupling proteins 1 and 2 (UCP1 and UCP2) from Arabidopsis thaliana are mitochondrial transporters of aspartate, glutamate, and dicarboxylates. J Biol Chem 293: 4213–4227**

Pubmed: [Author and Title](#)

Google Scholar: [Author Only Title Only Author and Title](#)

**Murcha MW, Kniec B, Kubiszewski-Jakubiak S, Teixeira PF, Glaser E, Whelan J (2014) Protein import into plant mitochondria: Signals, machinery, processing, and regulation. J Exp Bot 65: 6301–6335**

Pubmed: [Author and Title](#)

Google Scholar: [Author Only Title Only Author and Title](#)

**Murcha MW, Narsai R, Devenish J, Kubiszewski-Jakubiak S, Whelan J (2015) MPIC: A mitochondrial protein import components database for plant and non-plant species. Plant Cell Physiol 56: e10**

Pubmed: [Author and Title](#)

Google Scholar: [Author Only Title Only Author and Title](#)

**Nickel C, Horneff R, Heermann R, Neumann B, Jung K, Soll J, Schwenkert S (2019) Phosphorylation of the outer membrane mitochondrial protein OM64 influences protein import into mitochondria. Mitochondrion 44: 93–102**

Pubmed: [Author and Title](#)

Google Scholar: [Author Only Title Only Author and Title](#)

**Ogren WL, Bowes G (1971) Ribulose diphosphate carboxylase regulates soybean photorespiration. Nat New Biol 230: 159**

Pubmed: [Author and Title](#)

Google Scholar: [Author Only Title Only Author and Title](#)

**Oliver DJ, Neuburger M, Bourguignon J, Douce R (1990) Interaction between the component enzymes of the glycine decarboxylase multienzyme complex. Plant Physiol 94: 833–9**

Pubmed: [Author and Title](#)

Google Scholar: [Author Only Title Only Author and Title](#)

**Pendergrass W, Wolf N, Pool M (2004) Efficacy of MitoTracker Green™ and CMXRosamine to measure changes in mitochondrial membrane potentials in living cells and tissues. Cytom Part A 61: 162–169**

Pubmed: [Author and Title](#)

Google Scholar: [Author Only Title Only Author and Title](#)

**Peterhansel C, Horst I, Niessen M, Blume C, Kebeish R, Kürkcüoglu S, Kreuzaler F (2010) Photorespiration. Arab B 8: e0130**

Pubmed: [Author and Title](#)

Google Scholar: [Author Only Title Only Author and Title](#)

**Peters K, Belt K, Braun H-P (2013) 3D gel map of Arabidopsis Complex I. Front Plant Sci 4: 1–9**

Pubmed: [Author and Title](#)

Google Scholar: [Author Only Title Only Author and Title](#)

**Porcelli V, Vozza A, Calcagnile V, Gorgoglione R, Arrigoni R, Fontanesi F, Marobbio CMT, Castegna A, Palmieri F, Palmieri L (2018) Molecular identification and functional characterization of a novel glutamate transporter in yeast and plant mitochondria. Biochim Biophys Acta - Bioenerg 1859: 1249–1258**

Pubmed: [Author and Title](#)

Google Scholar: [Author Only Title Only Author and Title](#)

**Rao RSP, Salvato F, Thal B, Eubel H, Thelen JJ, Møller IM (2017) The proteome of higher plant mitochondria. Mitochondrion 33: 22–37**

Pubmed: [Author and Title](#)

Google Scholar: [Author Only Title Only Author and Title](#)

**Schneider M, Knuesting J, Birkholz O, Heinisch JJ, Scheibe R (2018) Cytosolic GAPDH as a redox-dependent regulator of energy metabolism. BMC Plant Biol 18: 1–14**

Pubmed: [Author and Title](#)

Google Scholar: [Author Only Title Only Author and Title](#)

**Schürholz A-K, López-Salmerón V, Li Z, Forner J, Wenzl C, Gaillochet C, Augustin S, Barro AV, Fuchs M, Gebert M, et al (2018) A Comprehensive toolkit for inducible, cell type-specific gene expression in Arabidopsis. Plant Physiol 178: 40–53**

Pubmed: [Author and Title](#)

Google Scholar: [Author Only Title Only Author and Title](#)

**Senkler J, Senkler M, Eubel H, Hildebrandt T, Lengwenus C, Schertl P, Schwarzländer M, Wagner S, Wittig I, Braun HP (2017) The mitochondrial complexome of Arabidopsis thaliana. Plant J 89: 1079–1092**

Pubmed: [Author and Title](#)

Google Scholar: [Author Only Title Only Author and Title](#)

**Suh JR, Herbig AK, Stover PJ (2001) New perspectives on folate catabolism. Annu Rev Nutr 21: 255–82**

Pubmed: [Author and Title](#)

Google Scholar: [Author Only Title Only Author and Title](#)

**Sunderhaus S, Klodmann J, Perales M, Jansch L, Dudkina N V., Braun H-P, Heinemeyer J, Boekema EJ, Zabaleta E (2006) Carbonic anhydrase subunits form a matrix-exposed domain attached to the membrane arm of mitochondrial Complex I in plants. J Biol Chem 281: 6482–6488**

Pubmed: [Author and Title](#)

Google Scholar: [Author Only](#) [Title Only](#) [Author and Title](#)

**Sweetlove LJ, Taylor NL, Leaver CJ (2007) Isolation of intact, functional mitochondria from the model plant *Arabidopsis thaliana*. From Methods Mol Biol 372: 125–136**

Pubmed: [Author and Title](#)

Google Scholar: [Author Only](#) [Title Only](#) [Author and Title](#)

**Tomaz T, Lee CP, Bagard M, Pracharoenwattana I, Linde P, Smith SM, Gardestro P, Millar AH, Carroll AJ, Stro E, et al (2010) Mitochondrial malate dehydrogenase lowers leaf respiration and alters photorespiration and plant growth in *Arabidopsis*. Plant Physiol 154: 1143–1157**

Pubmed: [Author and Title](#)

Google Scholar: [Author Only](#) [Title Only](#) [Author and Title](#)

**Turano FJ, Dashner R, Upadhyaya A, Caldwell C (1996) Purification of mitochondrial glutamate dehydrogenase from dark-grown soybean seedlings. Plant Physiol 112: 1357–1364**

Pubmed: [Author and Title](#)

Google Scholar: [Author Only](#) [Title Only](#) [Author and Title](#)

**Voll LM, Jamai A, Renné P, Voll H, McClung CR, Weber APM (2006) The photorespiratory *Arabidopsis shm1* mutant is deficient in SHM1. Plant Physiol 140: 59–66**

Pubmed: [Author and Title](#)

Google Scholar: [Author Only](#) [Title Only](#) [Author and Title](#)

**Werhahn W, Jansch L, Braun HP (2003) Identification of novel subunits of the TOM complex from *Arabidopsis thaliana*. Plant Physiol Biochem 41: 407–416**

Pubmed: [Author and Title](#)

Google Scholar: [Author Only](#) [Title Only](#) [Author and Title](#)

**Werhahn W, Niemeyer A, Jansch L, Kruff V, Schmitz UK, Braun H (2001) Purification and characterization of the preprotein translocase of the outer mitochondrial membrane from *Arabidopsis*. Identification of multiple forms of TOM20. Plant Physiol 125: 943–54**

Pubmed: [Author and Title](#)

Google Scholar: [Author Only](#) [Title Only](#) [Author and Title](#)

**Wiedemann N, Frazier AE, Pfanner N (2004) The protein import machinery of mitochondria. J Biol Chem 279: 14473–6**

Pubmed: [Author and Title](#)

Google Scholar: [Author Only](#) [Title Only](#) [Author and Title](#)

**Wilkie SE, Warren MJ (1998) Recombinant expression, purification, and characterization of three isoenzymes of aspartate aminotransferase from *Arabidopsis thaliana*. Protein Expr Purif 12: 381–389**

Pubmed: [Author and Title](#)

Google Scholar: [Author Only](#) [Title Only](#) [Author and Title](#)

**Yang Y, Costa A, Leonhardt N, Siegel RS, Schroeder JI (2008) Isolation of a strong *Arabidopsis* guard cell promoter and its potential as a research tool. Plant Methods 4: 1–15**

Pubmed: [Author and Title](#)

Google Scholar: [Author Only](#) [Title Only](#) [Author and Title](#)
